# Supplementary material for: Multi-channel dilution analysis
Source: Royal Society of Chemistry journal article supplement (doi:10.1039/d4ja00112e), 2024-01-01
Supplement: d4ja00112e1.xlsx [file d4ja00112e1.xlsx]

## Sheet: notes
This supplementary information workbook contains an example calculation for MCDA measurements, including all steps from raw data output by the instrument.
	The data was used to construct Fig. 8A in the manuscript.
	The sample matrix was deionized water, and the sample and standard contained all analytes at equal concentrations.
	The sample and standard contained 0.799 ppm Cd, 1.13 ppm Cr, 1.17 ppm Cu, 0.174 ppm Mn, 7.88 ppm Pb, and 2.29 ppm V.
	The standard portion of Solution 2 also contained Y as an internal standard
	The blank portion of Solution 1 contained Sc as an internal standard
The "raw data" worksheet contains raw data output by the instrument. There are three measurement sets included:
	the first data set (column heading load S2) corresponds to the manifold being loaded by solution 2, and is not used for calculations
	the second data set (column heading to S1) corresponds to the autosampler switching from Solution 2 to Solution 1, hence the intensity decreases for all analytes and IS Y, while IS Sc increases
	the third data set (column heading to S2) corresponds to the autosampler switching back to S2, increasing all analytes and IS Y, which IS Sc decreases
The "stairsteps" worksheet contains the raw data necessary for MCDA calculations (the "to S1" and "to S2" columns) appended into a single array for each analyte and internal standard
	The "Time" column has replaced the replicate number. A single measurement ("to S1" or "to S2") contains thirty 5 second replicates, so the two measurements in a single array represent sixty replicates (300 seconds)
	A plot containing the signal stairsteps for Mn as the analyte and both internal standards (Y and Sc) is included.
	The plateau intensities used for further calculations were the average signals measured from times 15-20 s, 55-60 s, 95-100 s, 150-155 s, 205-210 s, 250-255 s, and 290-295 s
The "MCDA plots" worksheet contains the average signal measured on each plateau in the "stairsteps" worksheet used for the MCDA calculation
	The cross plots required for the calculation are provided for Mn (Fig. 8A in the manuscript) and Pb. All that is needed for the calculation are the intercepts of these two plots and the concentration of the analyte in the standard portion of Solution 2
	The concentration of analyte in the sample is calcuated according to Eq. 3 in the manuscript: ((Y int/(Sc int - Y int))*Cstd
	This example calculation using the provided plots returns a %error of -0.4% for Mn and -0.7% for Pb

## Sheet: raw data
	load S2	load S2	load S2	load S2	load S2	load S2	load S2	load S2	to S1	to S1	to S1	to S1	to S1	to S1	to S1	to S1	to S2	to S2	to S2	to S2	to S2	to S2	to S2	to S2
Replicate	Cd 214.439	Cr 267.716	Cu 327.395	Mn 257.610	Pb 220.353	Sc 361.383	V 292.401	Y 371.029	Cd 214.439	Cr 267.716	Cu 327.395	Mn 257.610	Pb 220.353	Sc 361.383	V 292.401	Y 371.029	Cd 214.439	Cr 267.716	Cu 327.395	Mn 257.610	Pb 220.353	Sc 361.383	V 292.401	Y 371.029
1	35.2	29.56	30.24	29.02	11.46	85.02	22.27	60.16	80376.3	78876.5	76706.9	74588.8	68083.3	75.61	76998	72651.6	40246.1	39447.6	38136.1	37160	33940.9	74582.2	38389.6	113.63
2	27.02	30.71	32.61	25.72	19.63	51.72	52.35	40.46	80104.9	78708.9	76540.5	74564	67976.4	85.86	76825	72458.6	40188.8	39336.3	38096.9	37255.2	33943.2	74365.4	38264.2	48.77
3	10.4	36.15	14.92	50.95	27.57	54.41	5.58	49.2	80768.7	79358	76938.2	74920.3	68426.8	94.72	77294.6	72739	40241.3	39381.7	38088.1	37240.5	34005.7	74356.2	38296	63.04
4	20.6	27.06	9.17	31.83	42.98	56.23	0.99	40.1	79800.4	78336.3	76034.2	74199.4	67688	98.83	76476.3	72130.4	40309.4	39339.1	38134.6	37262.8	33989.6	74377	38362.6	87.61
5	22.68	18.8	33.85	35.44	24.72	56	17.95	92.63	80321.1	78750.6	76443.5	74511.5	68072.3	92.59	76865.5	72373.3	40159.3	39252.5	37952.7	37084.5	33889.9	74173.9	38252.5	127.33
6	727.56	649.08	769.51	643.67	564.45	77.61	619.12	679.88	74685.6	73535.6	70806.6	69355.4	63375	623.84	71711.9	67149.6	37600.4	37130.1	35539.8	34882.7	31713.1	69795.2	35839.4	71.3
7	49441	49124.5	47609.7	46376.1	42101.6	54.09	47884.1	45184.8	55309.9	54673.7	52932.7	51559.1	47096.7	45046.3	53410.1	28468.9	62642.5	61928.1	59967.1	58641.7	53386.7	30539.6	60596.2	42159.3
8	52720.3	51984.7	50479	49223.2	44701.7	64.55	50662.2	47800.6	54132.6	53096.7	51556.9	50266.2	45827	48546.2	51854.1	25443.9	66098.5	64762.2	62824	61316.2	56154.6	26290.1	63332	46961.3
9	53227.8	52296.6	50972.4	49535.9	45266.6	96.21	51093.4	48301	53768.2	52742.5	50880	49884.4	45547	49070.2	51352.1	24736.8	66952.4	65613.7	63742	62122.2	56700.5	25537.5	64014.7	48108.1
10	53385.4	52504.7	50996	49633.4	45345.9	112.82	51140.3	48323.9	53698.1	52689.3	50876.8	49718.4	45322.9	49357.3	51246.7	24475.8	66982.2	65712.8	63647.9	62205.1	56610	25015.5	64018.5	48366.7
11	53618.4	52832.6	51302.7	49874	45505	73.94	51350.7	48716.4	53573.7	52423.3	50712	49668.2	45301.6	49621.9	51004.9	24152	66859.6	65631.9	63629.2	62165.6	56652.4	24838.2	63955.8	48412.6
12	53687.8	52811.5	51256.5	49997.2	45613.6	81.78	51421.2	48537.4	53597.8	52422.2	50641	49678.8	45256.4	49773.5	51051	24193.2	66945.2	65513.7	63434.4	62144.1	56560.5	24693.4	63931.6	48432.2
13	53693.3	52744.5	51262.5	49917.6	45381.6	92.96	51383.5	48605.5	53431.1	52282.9	50572.4	49544.5	45186.5	49692.3	50988.2	24110.1	66727.3	65362.4	63119.5	61690.2	56346.2	24648.7	63607.8	48123.3
14	55279.9	54649.6	52934	51482.6	46763	74.86	53100.3	50188.1	51987.4	50715.8	49245.8	48167.5	44028.2	52685.8	49574.8	21213.3	68923.5	67601.1	65213.9	63819.6	58235	21249.6	65682.9	51811
15	70740.8	69741.3	67328.5	65808.6	59819.9	97.81	68001	64056.7	43794.7	43024.4	41420	40598.2	37060	64755.4	41885.8	8122.68	73879.5	72868.1	70454.2	68800.1	62848	7982.15	71228.8	63206.1
16	73745.1	72679.9	70444.6	68689.2	62496	39.77	70742.9	66818.7	43889.2	42935.8	41478.2	40613.1	37155.8	67324.5	41788.8	6849.09	76057.7	74858	72516	70728.1	64549	7339.35	73061.2	65350.9
17	73665	72556.2	70150.1	68443.8	62250.1	95.08	70575.1	66729.4	44001.8	42956.6	41601.1	40698.7	37138.5	67711.3	41851.7	6701.63	77033.2	75732.1	73341.8	71824.4	65326.3	6320.87	73752	66583.7
18	72541	71086.8	69164.2	67300.7	61580.6	90.14	69443	65403.9	44102.1	43086.5	41707.5	40821.6	37206.3	67560.6	41955.1	6824.56	77026.1	75902.7	73529.4	71562.9	65308.9	6530.41	73947	66561.1
19	72391.2	71207.3	69202.2	67323.9	61551.4	60.08	69466.3	65501.3	44062.7	43097.1	41838.9	40876	37246.9	67701.8	41986.7	6821.95	76848.7	75546.4	73096.9	71393.9	65256.2	6788.98	73561.4	66195.6
20	72849	71630.6	69473.1	67649.2	61724.4	84.61	69752.5	65695.6	44105.5	43137.8	41677.9	40962.4	37258.9	67778.9	42057.4	6784.52	76366.7	75070.5	72848	70986.7	64842.6	6893.83	73155.4	65770.6
21	72929	71596.1	69547.7	67665.1	61835	47.23	69808.2	65885.9	43885.3	42939.2	41536.8	40682.1	37204.3	67491.7	41783.1	6727.91	76764.6	75391.7	72987.6	71258.1	64994.8	6882.85	73374.8	65835.5
22	71351.2	70137.4	68109.6	66396.3	60571.2	54.39	68400.7	64581.2	44232.2	43239.1	41819.5	40980.7	37282.3	66907.2	42211.1	7294.31	76418.1	74892.9	72645.3	70848.5	64673.2	7668.62	73035.1	65043.1
23	76742.8	75700.1	73032.7	71426.9	65143.3	111.52	73648.8	69406.4	41315	40335.1	39216.3	38278.6	34968.6	71114.6	39372.3	2695.07	77339.2	76146.6	73945.9	71974.3	65735.4	3887.27	74393.6	68324.9
24	80145	78695.7	76307.2	74559.4	67969.2	87.77	76856.5	72230.7	40322.3	39371.2	38084	37283.4	33988.6	74202.9	38389.3	193.46	80307	78981.4	76738.5	74659.6	68105.6	249.51	77102.1	72675.5
25	80252.5	78715	76559.3	74511.1	67930.9	53.19	76836.4	72525.7	40267.6	39204.9	38054	37228.8	33994	74126.6	38253.5	177.93	80195.1	78879.1	76402.9	74494.1	67851	224.65	77004.9	72510.3
26	80220.2	78797	76338.4	74396.6	67824.8	84.91	76754.6	72409.2	40232.3	39331.9	38130.7	37394	34126	74304.2	38379.5	168.01	80166	78735	76408.9	74415.4	67785.8	224.68	76847.9	72314.1
27	80478.7	79066.6	76759.3	74726.4	68194.4	57.7	77105.3	72794	40227.4	39337.8	37984.4	37299	34097.1	74125.3	38312.7	160.8	80573.4	79165	76880.1	74770.3	68333.6	216.36	77127.8	72733.3
28	80285.8	78873.6	76584.1	74584.9	68032.3	101.2	76834.6	72457.3	40334.9	39279	37937.4	37200.8	33923.4	74001.5	38207.4	129.82	80518.1	79081.4	76940.2	74860.4	68147.7	303.18	77229.1	72841.4
29	80471.5	78861.8	76613.6	74523.7	68100.3	88.47	76947.9	72585	40253.1	39314.4	38008.6	37318.1	33945.4	74114.2	38280.7	113.91	80238.4	79101.3	76884.3	74593.8	68089	264.99	77010	72710.5
30	80213.6	78716	76329	74283.7	67871.8	51.52	76698.8	72237.1	40316.7	39302.6	37966.9	37259.6	33956.2	74097.6	38340.1	136.45	80330.2	78955.4	76661.9	74636.8	68085.6	180.73	76908.2	72556.4

## Sheet: stairsteps
Time	Cd 214.439	Cr 267.716	Cu 327.395	Mn 257.610	Pb 220.353	Sc 361.383	V 292.401	Y 371.029
5	80376.3	78876.5	76706.9	74588.8	68083.3	75.61	76998	72651.6
10	80104.9	78708.9	76540.5	74564	67976.4	85.86	76825	72458.6
15	80768.7	79358	76938.2	74920.3	68426.8	94.72	77294.6	72739
20	79800.4	78336.3	76034.2	74199.4	67688	98.83	76476.3	72130.4
25	80321.1	78750.6	76443.5	74511.5	68072.3	92.59	76865.5	72373.3
30	74685.6	73535.6	70806.6	69355.4	63375	623.84	71711.9	67149.6
35	55309.9	54673.7	52932.7	51559.1	47096.7	45046.3	53410.1	28468.9
40	54132.6	53096.7	51556.9	50266.2	45827	48546.2	51854.1	25443.9
45	53768.2	52742.5	50880	49884.4	45547	49070.2	51352.1	24736.8
50	53698.1	52689.3	50876.8	49718.4	45322.9	49357.3	51246.7	24475.8
55	53573.7	52423.3	50712	49668.2	45301.6	49621.9	51004.9	24152
60	53597.8	52422.2	50641	49678.8	45256.4	49773.5	51051	24193.2
65	53431.1	52282.9	50572.4	49544.5	45186.5	49692.3	50988.2	24110.1
70	51987.4	50715.8	49245.8	48167.5	44028.2	52685.8	49574.8	21213.3
75	43794.7	43024.4	41420	40598.2	37060	64755.4	41885.8	8122.68
80	43889.2	42935.8	41478.2	40613.1	37155.8	67324.5	41788.8	6849.09
85	44001.8	42956.6	41601.1	40698.7	37138.5	67711.3	41851.7	6701.63
90	44102.1	43086.5	41707.5	40821.6	37206.3	67560.6	41955.1	6824.56
95	44062.7	43097.1	41838.9	40876	37246.9	67701.8	41986.7	6821.95
100	44105.5	43137.8	41677.9	40962.4	37258.9	67778.9	42057.4	6784.52
105	43885.3	42939.2	41536.8	40682.1	37204.3	67491.7	41783.1	6727.91
110	44232.2	43239.1	41819.5	40980.7	37282.3	66907.2	42211.1	7294.31
115	41315	40335.1	39216.3	38278.6	34968.6	71114.6	39372.3	2695.07
120	40322.3	39371.2	38084	37283.4	33988.6	74202.9	38389.3	193.46
125	40267.6	39204.9	38054	37228.8	33994	74126.6	38253.5	177.93
130	40232.3	39331.9	38130.7	37394	34126	74304.2	38379.5	168.01
135	40227.4	39337.8	37984.4	37299	34097.1	74125.3	38312.7	160.8
140	40334.9	39279	37937.4	37200.8	33923.4	74001.5	38207.4	129.82
145	40253.1	39314.4	38008.6	37318.1	33945.4	74114.2	38280.7	113.91
150	40316.7	39302.6	37966.9	37259.6	33956.2	74097.6	38340.1	136.45
155	40246.1	39447.6	38136.1	37160	33940.9	74582.2	38389.6	113.63
160	40188.8	39336.3	38096.9	37255.2	33943.2	74365.4	38264.2	48.77
165	40241.3	39381.7	38088.1	37240.5	34005.7	74356.2	38296	63.04
170	40309.4	39339.1	38134.6	37262.8	33989.6	74377	38362.6	87.61
175	40159.3	39252.5	37952.7	37084.5	33889.9	74173.9	38252.5	127.33
180	37600.4	37130.1	35539.8	34882.7	31713.1	69795.2	35839.4	71.3
185	62642.5	61928.1	59967.1	58641.7	53386.7	30539.6	60596.2	42159.3
190	66098.5	64762.2	62824	61316.2	56154.6	26290.1	63332	46961.3
195	66952.4	65613.7	63742	62122.2	56700.5	25537.5	64014.7	48108.1
200	66982.2	65712.8	63647.9	62205.1	56610	25015.5	64018.5	48366.7
205	66859.6	65631.9	63629.2	62165.6	56652.4	24838.2	63955.8	48412.6
210	66945.2	65513.7	63434.4	62144.1	56560.5	24693.4	63931.6	48432.2
215	66727.3	65362.4	63119.5	61690.2	56346.2	24648.7	63607.8	48123.3
220	68923.5	67601.1	65213.9	63819.6	58235	21249.6	65682.9	51811
225	73879.5	72868.1	70454.2	68800.1	62848	7982.15	71228.8	63206.1
230	76057.7	74858	72516	70728.1	64549	7339.35	73061.2	65350.9
235	77033.2	75732.1	73341.8	71824.4	65326.3	6320.87	73752	66583.7
240	77026.1	75902.7	73529.4	71562.9	65308.9	6530.41	73947	66561.1
245	76848.7	75546.4	73096.9	71393.9	65256.2	6788.98	73561.4	66195.6
250	76366.7	75070.5	72848	70986.7	64842.6	6893.83	73155.4	65770.6
255	76764.6	75391.7	72987.6	71258.1	64994.8	6882.85	73374.8	65835.5
260	76418.1	74892.9	72645.3	70848.5	64673.2	7668.62	73035.1	65043.1
265	77339.2	76146.6	73945.9	71974.3	65735.4	3887.27	74393.6	68324.9
270	80307	78981.4	76738.5	74659.6	68105.6	249.51	77102.1	72675.5
275	80195.1	78879.1	76402.9	74494.1	67851	224.65	77004.9	72510.3
280	80166	78735	76408.9	74415.4	67785.8	224.68	76847.9	72314.1
285	80573.4	79165	76880.1	74770.3	68333.6	216.36	77127.8	72733.3
290	80518.1	79081.4	76940.2	74860.4	68147.7	303.18	77229.1	72841.4
295	80238.4	79101.3	76884.3	74593.8	68089	264.99	77010	72710.5
300	80330.2	78955.4	76661.9	74636.8	68085.6	180.73	76908.2	72556.4
	Cd 214.439	Cr 267.716	Cu 327.395	Mn 257.610	Pb 220.353	Sc 361.383	V 292.401	Y 371.029
15 20	80284.5	78847.1	76486.2	74559.8	68057.4	96.775	76885.5	72434.7
55 60	53585.7	52422.7	50676.5	49673.5	45279	49697.7	51027.9	24172.6
95 100	44084.1	43117.4	41758.4	40919.2	37252.9	67740.4	42022.1	6803.24
150 155	40281.4	39375.1	38051.5	37209.8	33948.6	74339.9	38364.8	125.04
205 210	66902.4	65572.8	63531.8	62154.8	56606.4	24765.8	63943.7	48422.4
250 255	76565.6	75231.1	72917.8	71122.4	64918.7	6888.34	73265.1	65803.1
290 295	80378.3	79091.3	76912.3	74727.1	68118.4	284.085	77119.6	72775.9

## Sheet: MCDA plots
Plateau	Cd 214.439	Cr 267.716	Cu 327.395	Mn 257.610	Pb 220.353	Sc 361.383	V 292.401	Y 371.029
1	80284.5	78847.1	76486.2	74559.8	68057.4	96.775	76885.5	72434.7
2	53585.7	52422.7	50676.5	49673.5	45279	49697.7	51027.9	24172.6
3	44084.1	43117.4	41758.4	40919.2	37252.9	67740.4	42022.1	6803.24
4	40281.4	39375.1	38051.5	37209.8	33948.6	74339.9	38364.8	125.04
5	66902.4	65572.8	63531.8	62154.8	56606.4	24765.8	63943.7	48422.4
6	76565.6	75231.1	72917.8	71122.4	64918.7	6888.34	73265.1	65803.1
7	80378.3	79091.3	76912.3	74727.1	68118.4	284.085	77119.6	72775.9
Sc intercept	80354.5	78961.6	76630.8	74670.5	68109.2		76969.3
Y intercept	40254.9	39303.2	37968.4	37259.2	33943.4		38282.4
Cstd	0.799	1.13	1.17	0.174	7.88		2.29
Csam	0.802096	1.11988	1.14899	0.173293	7.8287		2.26605
%error	0.387535	-0.895636	-1.79539	-0.406306	-0.651037		-1.04577
