# Supplementary material for: Multi-channel dilution analysis
Source: Royal Society of Chemistry journal article supplement (doi:10.1039/d4ja00112e), 2024-01-01
Supplement: d4ja00112e2.pdf [file d4ja00112e2.pdf]

**Table S1. Selected emission wavelengths for all analytes and internal standards.**

| Element | Function          | Wavelength (nm) |         |         |         |
|---------|-------------------|-----------------|---------|---------|---------|
|         |                   |                 |         |         |         |
| As      | Analyte           | 188.980         | 193.696 | 197.198 |         |
| Ba      | Analyte           | 233.527         | 455.403 | 493.408 |         |
| Be      | Analyte           | 234.861         | 313.042 | 313.107 |         |
| Ca      | Analyte           | 393.366         | 396.847 | 422.673 |         |
| Cd      | Analyte           | 214.439         | 226.502 | 228.802 |         |
| Co      | Analyte           | 228.615         | 230.786 | 237.863 |         |
| Cr      | Analyte           | 205.560         | 267.716 | 283.563 |         |
| Cu      | Analyte           | 223.009         | 224.700 | 327.395 |         |
| Fe      | Analyte           | 234.350         | 238.204 | 239.563 | 259.940 |
| Mg      | Analyte           | 279.553         | 280.270 | 285.213 |         |
| Mn      | Analyte           | 257.610         | 259.372 | 294.921 |         |
| Mo      | Analyte           | 202.032         | 204.598 | 277.539 | 284.824 |
| Ni      | Analyte           | 216.555         | 222.486 | 230.299 |         |
| Pb      | Analyte           | 220.353         | 283.305 | 405.781 |         |
| Sb      | Analyte           | 206.834         | 217.582 | 231.146 |         |
| Sc      | Internal Standard | 335.372         | 361.383 |         |         |
| Se      | Analyte           | 196.026         | 203.985 |         |         |
| Sr      | Analyte           | 216.596         | 407.771 | 421.552 | 460.733 |
| Tl      | Analyte           | 276.789         | 351.923 |         |         |
| U       | Analyte           | 367.007         | 385.957 | 409.013 |         |
| V       | Analyte           | 292.401         | 292.464 | 311.837 |         |
| Y       | Internal Standard | 360.074         | 371.029 |         |         |
| Zn      | Analyte           | 202.548         | 206.200 | 213.857 |         |
